# Supplementary material for: Construction and application of highly sensitive spinel nanocrystalline zinc chromite decorated multiwalled carbon nanotube modified carbon paste electrode (ZnCr2O4@MWCNTs/CPE) for electrochemical determination of alogliptin benzoate in bulk and its dosage form: green chemistry assessment
Source: Royal Society of Chemistry journal article supplement (doi:10.1039/d2ra02685f), 2022-01-01
Supplement: d2ra02685f1.pdf [file d2ra02685f1.pdf]

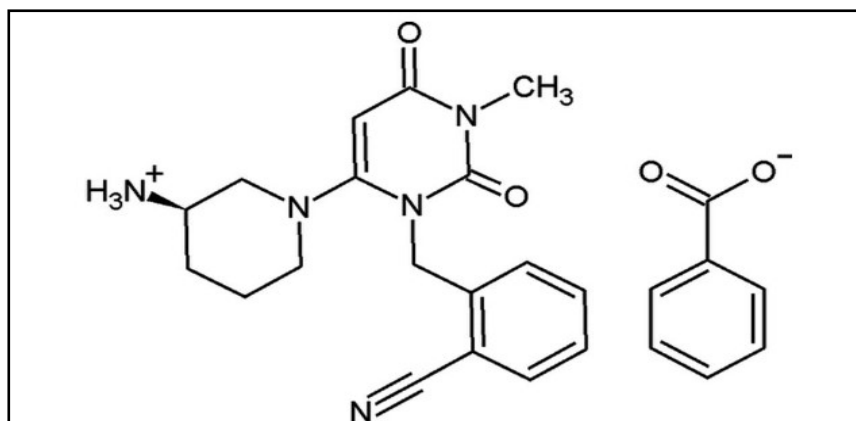

Figure 1S chemical structure of ALG.

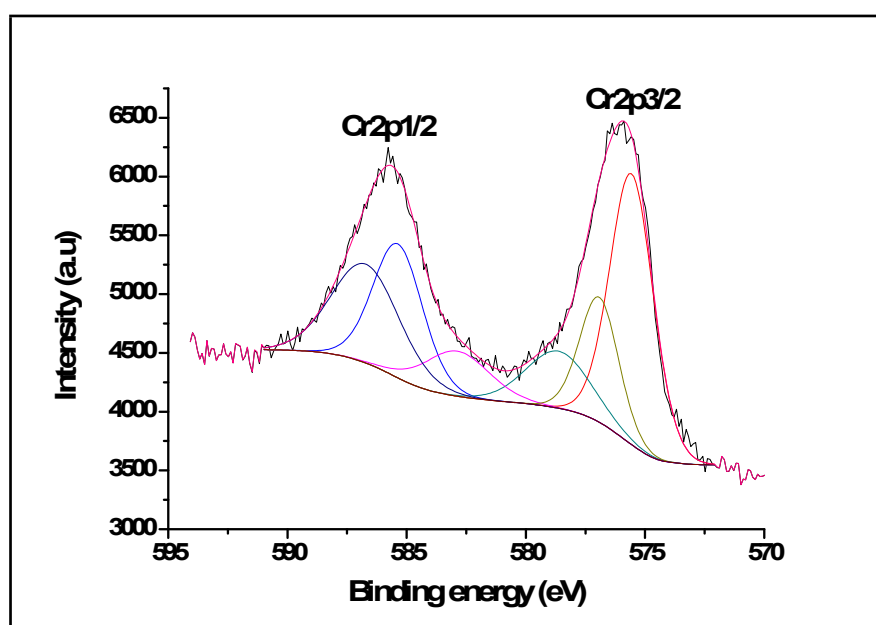

Figure 2S. Cr 2p XPS spectra for ZnCr<sub>2</sub>O<sub>4</sub>/MWCNT nanoparticles.

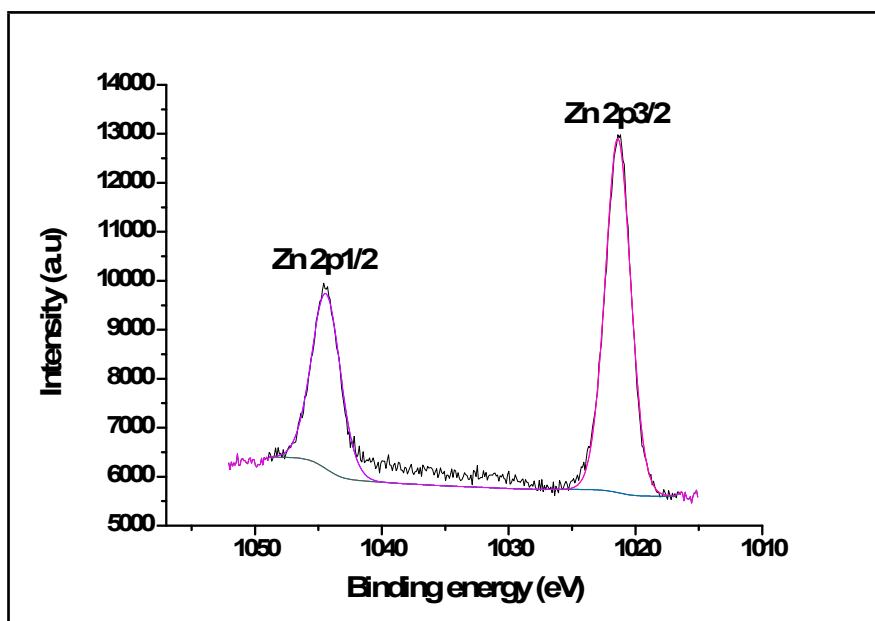

Figure 3S. Zn 2p XPS spectra for ZnCr<sub>2</sub>O<sub>4</sub>/MWCNT nanoparticles.

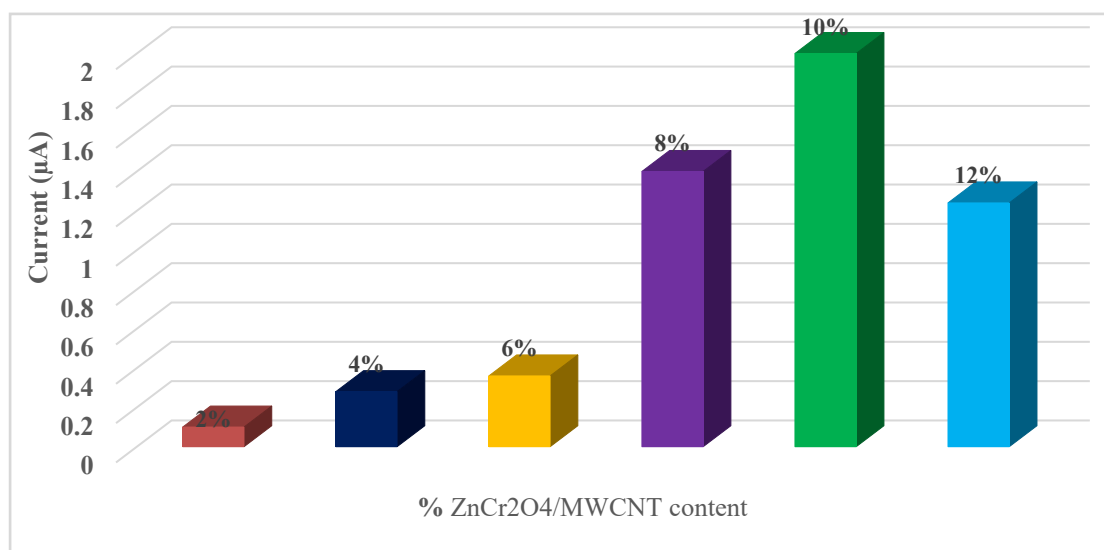

Figure 4S: cyclic voltammetric behavior of different concentration of ZnCr<sub>2</sub>O<sub>4</sub>/MWCNT electrode.

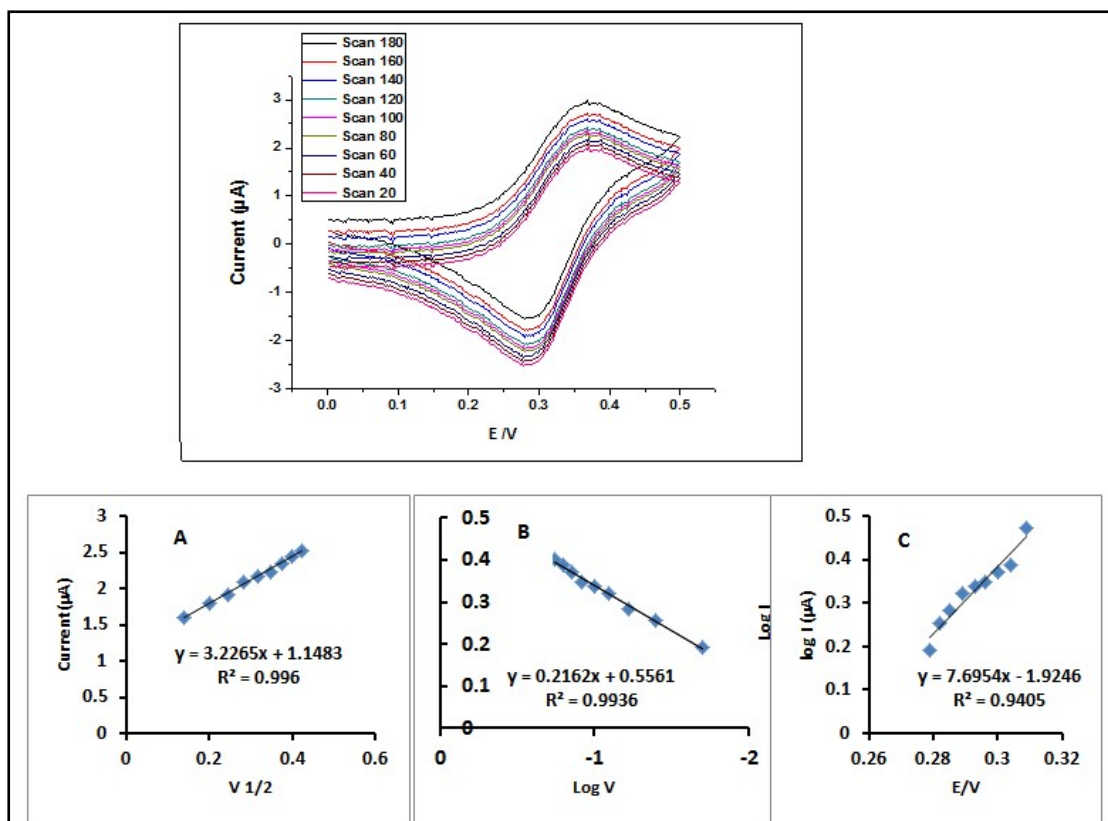

**Figure 5S** Different scan rates (20.0 - 180.0 mV s<sup>-1</sup>) for cyclic voltammety responses of  $1 \times 10^{-4}$  mol L<sup>-1</sup> of ALG using ZnCr<sub>2</sub>O<sub>4</sub>/MWCNT electrode with PBS (pH=3.0). Inset (A): (I<sub>pa</sub>) vs. (v<sup>1/2</sup>), inset (B): Log I vs. Log v and inset (C): Log I vs. E.

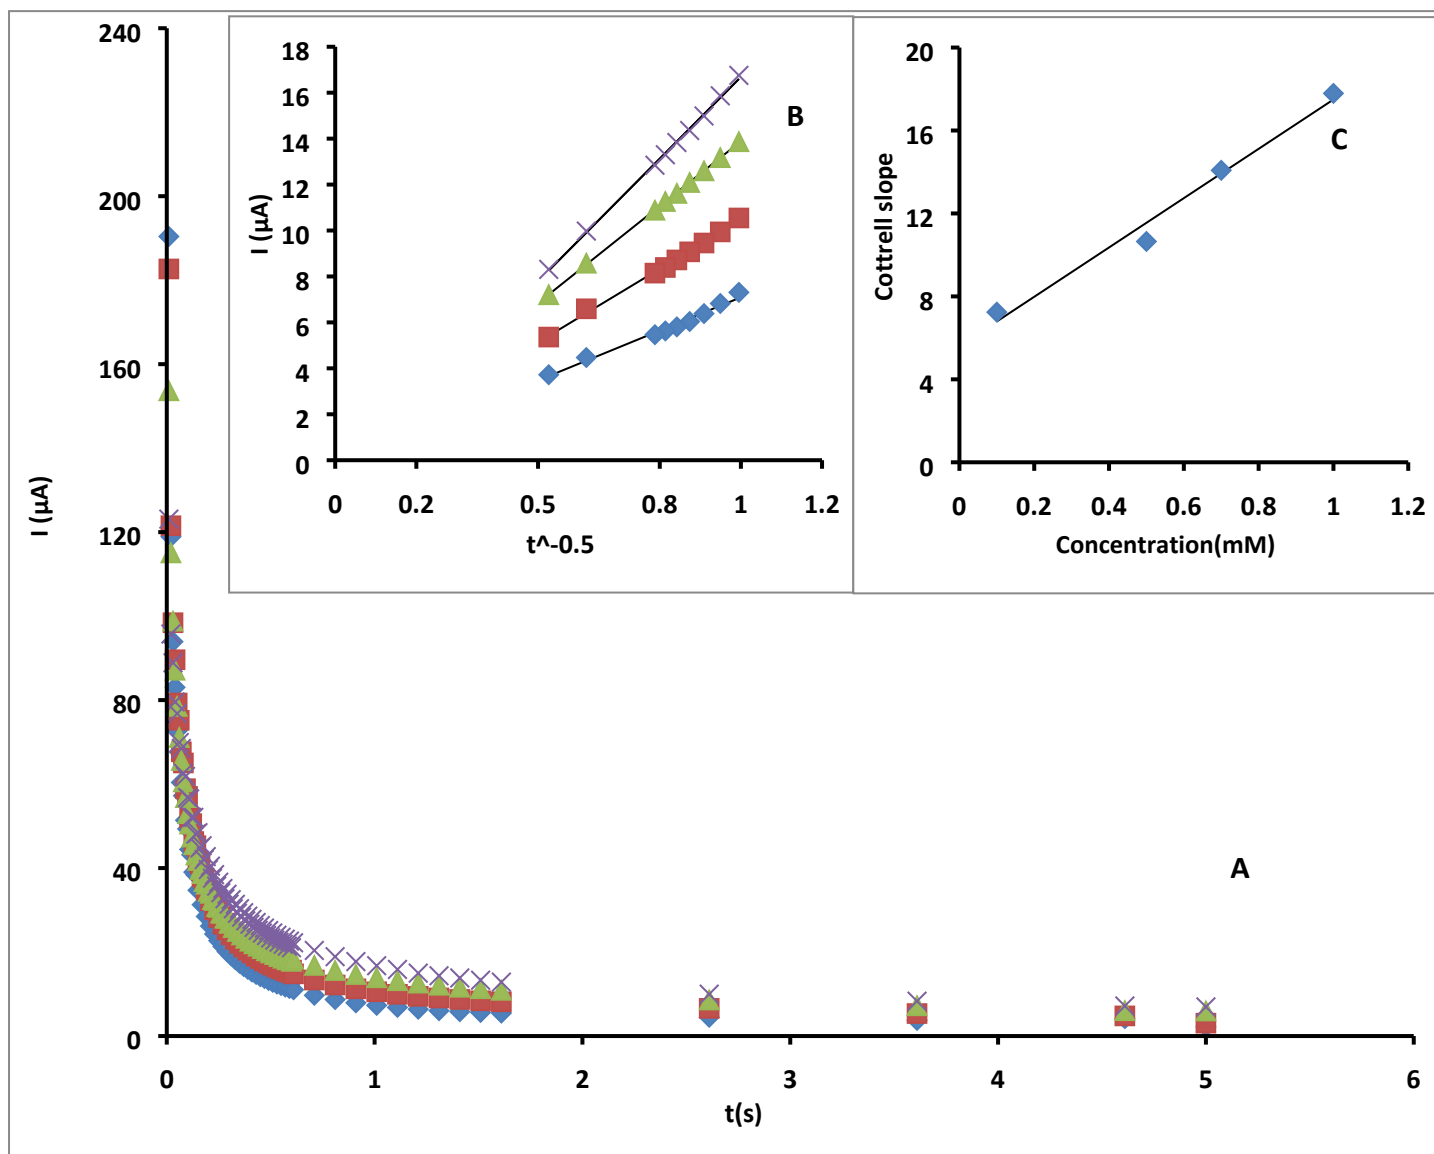

**Figure 6S:** (A) Chronoamperograms of ALG at  $\text{ZnCr}_2\text{O}_4/\text{MWCNT}/\text{CPE}$  in PBS buffer pH 3.0, containing: 0.1, 0.5, 0.7 and 1  $\text{mmol L}^{-1}$  ALG. (B) The plot of  $I$  ( $\mu\text{A}$ ) against  $t^{-1/2}$  ( $\text{S}^{-1/2}$ ) for different concentrations of ALG. (C) The plot of the resulted slopes in (B) against the concentrations of ALG.
